# Supplementary material for: The prognostic and clinicopathological significance of SLC7A11 in human cancers: a systematic review and meta-analysis
Source: PeerJ. 2023 Feb 27;11:e14931. doi: 10.7717/peerj.14931 (PMC9979827; doi:10.7717/peerj.14931)
Supplement: Data S1 [file peerj-11-14931-s003.xlsx]

## Sheet: OS_number
study	hr	lower	upper	Cancer type	data type	logHR	SE
Feng 2021	1.91	1.26	2.9	esophageal squamous cell carcinoma	PFS	0.647103	0.212653
Kinoshita 2013	1.62	1.03	2.57	hepatocellular carcinoma	RFS	0.482426	0.233252
Lee 2018	2.15	1.38	3.6	oral cavity squamous cell carcinoma	RFS	0.765468	0.244605
Ma 2017	1.82	1.19	2.8	laryngeal squamous cell carcinoma	RFS	0.598837	0.218282
Takeuchi 2013	2.84	1.05	5.38	glioblastoma	PFS	1.0438	0.416811
Toyoda 2014	1.37	0.41	4.3	tongue cancer	PFS	0.314811	0.599544

## Sheet: others_number
study	year	hr	lower	upper	Cancer type	logHR	SE
Kinoshita 2013	2013	2.43	1.19	4.98	hepatocellular carcinoma	0.887891	0.365173
Takeuchi 2013	2013	2.84	1.05	5.38	glioblastoma	1.0438	0.416811
Shiokazi 2014	2014	2.75	1.07	7.72	esophageal squamous cell carcinoma	1.0116	0.504121
Toyoda 2014	2014	1.29	0.4	3.59	tongue cancer	0.254642	0.559807
Sugano 2015	2015	2.62	1.3	6.02	colorectal cancer	0.963174	0.391001
Ma 2017	2017	1.82	1.19	2.8	laryngeal squamous cell carcinoma	0.598837	0.218282
Ji 2018	2018	1.27	1.04	1.54	non-small cell lung cancer	0.239017	0.100143
Lee 2018	2018	2.02	1.37	3	oral cavity squamous cell carcinoma	0.703098	0.199949
Zhang 2018	2018	2.71	1.54	5.38	liver carcinoma	0.996949	0.319109
Feng 2021	2021	1.8	1.19	2.73	esophageal squamous cell carcinoma	0.587787	0.211824

## Sheet: OS
study	year	hr	lower	upper	Cancer type	logHR	SE
Kinoshita 2013	2013	2.43	1.19	4.98	hepatocellular carcinoma	0.887891	0.365173
Takeuchi 2013	2013	2.84	1.05	5.38	glioblastoma	1.0438	0.416811
Shiokazi 2014	2014	2.75	1.07	7.72	esophageal squamous cell carcinoma	1.0116	0.504121
Toyoda 2014	2014	1.29	0.4	3.59	tongue cancer	0.254642	0.559807
Sugano 2015	2015	2.62	1.3	6.02	colorectal cancer	0.963174	0.391001
Ma 2017	2017	1.82	1.19	2.8	laryngeal squamous cell carcinoma	0.598837	0.218282
Ji 2018	2018	1.27	1.04	1.54	non-small cell lung cancer	0.239017	0.100143
Lee 2018	2018	2.02	1.37	3	oral cavity squamous cell carcinoma	0.703098	0.199949
Zhang 2018	2018	2.71	1.54	5.38	liver carcinoma	0.996949	0.319109
Feng 2021	2021	1.8	1.19	2.73	esophageal squamous cell carcinoma	0.587787	0.211824

## Sheet: others
study	hr	lower	upper	Cancer type	data type	logHR	SE
Feng 2021	1.91	1.26	2.9	esophageal squamous cell carcinoma	PFS	0.647103	0.212653
Kinoshita 2013	1.62	1.03	2.57	hepatocellular carcinoma	RFS	0.482426	0.233252
Lee 2018	2.15	1.38	3.6	oral cavity squamous cell carcinoma	RFS	0.765468	0.244605
Ma 2017	1.82	1.19	2.8	laryngeal squamous cell carcinoma	RFS	0.598837	0.218282
Takeuchi 2013	2.84	1.05	5.38	glioblastoma	PFS	1.0438	0.416811
Toyoda 2014	1.37	0.41	4.3	tongue cancer	PFS	0.314811	0.599544
