# Supplementary material for: The prognostic and clinicopathological significance of SLC7A11 in human cancers: a systematic review and meta-analysis
Source: PeerJ. 2023 Feb 27;11:e14931. doi: 10.7717/peerj.14931 (PMC9979827; doi:10.7717/peerj.14931)
Supplement: Data S2 [file peerj-11-14931-s004.xlsx]

## Sheet: Overall
Clinicopathologic parameters	Number of studies	Number of cases	Quantitative synthesis			Test for heterogeneity
			Pooled OR	95% CI	P value	I2	Model
Differentiation (poor vs well/moderate)	6	1147	0.75	0.55-1.02	0.07	0.18	fixed
Tumor stage (III/IV vs I/II)	3	1005	1.77	1.10-2.86	0.02	0.61	random
Lymph node metastasis (yes vs no)	4	843	1.32	0.70-2.49	0.39	0.7	random
Lymphatic invasion (yes vs no)	4	690	1.98	0.90-4.36	0.09	0.61	random
Venous invasion (yes vs no)	6	920	1.4	0.74-2.65	0.3	0.61	random
Distant metastasis (yes vs no)	3	750	1.4	0.93-2.11	0.11	0.18	random

## Sheet: Differentiation
Study	H	Hno	L	Lno				H	Hall	L	Lall
Kinoshita 2013	8	26	15	81	poor vs well/moderate			8	34	15	96
Lee 2018	66	67	62	36	poor vs well/moderate			66	133	62	98
Ma 2017	20	157	22	128	poor vs well/moderate			20	177	22	150
Shiozaki 2014	9	26	12	23	poor vs well/moderate			9	35	12	35
Sugano 2015	21	187	14	82	poor vs well/moderate			21	208	14	96
Toyoda 2014	4	14	8	59	poor vs well/moderate			4	18	8	67

## Sheet: Lymph node metastasis
Study	H	Hno	L	Lno				H	Hall	L	Lall
Feng 2021	16	46	6	59	Nx vs N0 (*1)			16	62	6	65
Ma 2017	56	121	34	116	Nx vs N0			56	177	34	150
Sugano 2015	107	101	42	54	Nx vs N0			107	208	42	96
Toyoda 2014	8	10	47	20	Nx vs N0			8	18	47	67

## Sheet: Tumor stage
Study	H	Hno	L	Lno				H	Hall	L	Lall
Feng 2021	49	13	47	18	IV/III vs II/I			49	62	47	65
Lee 2018	86	47	44	54	IV/III vs II/I			86	133	44	98
Namikawa 2015	24	26	33	17	IV/III vs II/I			24	50	33	50
Shiozaki 2014	16	19	10	25	IV/III vs II/I			16	35	10	35
Sugano 2015	121	87	44	52	IV/III vs II/I			121	208	44	96
Toyoda 2014	11	7	18	49	IV/III vs II/I			11	18	18	67
Zhang 2018	20	40	3	25	IV/III vs II/I			20	60	3	28

## Sheet: Lymphatic invasion
Study	H	Hno	L	Lno				H	Hall	L	Lall
Lee 2018	18	115	1	97	Positive vs Negative			18	133	1	98
Shiozaki 2014	18	17	20	15	Positive vs Negative			18	35	20	35
Sugano 2015	154	54	58	38	Positive vs Negative			154	208	58	96
Toyoda 2014	11	7	27	40	Positive vs Negative			11	18	27	67

## Sheet: Venous invasion
Study	H	Hno	L	Lno				H	Hall	L	Lall
Kinoshita 2013	17	17	41	55	Positive vs Negative			17	34	41	96
Lee 2018	18	115	1	97	Positive vs Negative			18	133	1	98
Namikawa 2015	5	45	12	38	Positive vs Negative			5	50	12	50
Shiozaki 2014	17	18	14	21	Positive vs Negative			17	35	14	35
Sugano 2015	62	146	17	79	Positive vs Negative			62	208	17	96
Toyoda 2014	6	12	21	46	Positive vs Negative			6	18	21	67

## Sheet: Distant metastasis
Study	H	Hno	L	Lno				H	Hall	L	Lall
Feng 2021	8	54	5	60	Positive vs Negative			8	62	5	65
Ma 2017	18	159	17	133	Positive vs Negative			18	177	17	150
Sugano 2015	66	142	20	76	Positive vs Negative			66	208	20	96
